# Supplementary material
Source: Springer Nature journal article supplement (https://www.springermedizin.de/resource/supplementary/12939_2011_281_MOESM1_ESM.pdf/9550734)
Supplement: MOESM1 [file 9550734]

## *Colonia Context*

---

### **Socioeconomic/Structural:**

- Rurality
- Extra-jurisdictional location
- Infrastructure limitations
- Socioeconomic class
- Ethnicity
- Gender)

### **Biological:**

- Vermin

### **Physical:**

- Hot and cold climate
- Rain
- Wind

## **Household Context**

---

### **Socioeconomic/Structural:**

- Traditional female gender roles
- Mexican-origin immigrant repertoires
- Limited household economic resources
- Competing resource demands
- Material condition of home
- Limited food resources

### **Biological:**

- Insects
- Rodents

### **Physical:**

- Hot and cold weather
- Rain
- Wind

## **Stages of Food Choice**

---

Cleaning

Acquisition → Storage → Preparation → Serving → Feeding & Eating

Waste Processing
